# Supplementary material for: Ombitasvir, Paritaprevir, Ritonavir, and Dasabuvir Mini-Tabs Plus Ribavirin for Children Aged 3–11 Years with Hepatitis C Genotype 1a
Source: Springer Nature journal article supplement (doi:10.1007/s12325-020-01389-9), 2020-05-25

## SUPPLEMENTAL DIGITAL CONTENT LEGENDS

### Eligibility Criteria, Supplement 1

#### B. EXCLUSION CRITERIA

1. Female subject who is pregnant, breastfeeding, or is considering becoming pregnant during the study or for approximately 30 days after stopping study drug (if not receiving RBV), or for up to 4 months after stopping study drug if receiving RBV (or as directed by local RBV label).
2. Use of known strong inducers and inhibitors (eg, gemfibrozil) of cytochrome P450 2C8 (CYP2C8) in patients receiving dasabuvir, or strong or moderate inducers of CYP3A, medications listed below, or medications contraindicated for ritonavir or RBV (for those who receive RBV), within 2 weeks or 10 half-lives, whichever is longer, of the respective medication prior to administration of study drugs, including but not limited to:

#### **Table. Medications contraindicated for use with the study drug regimen**

For medications contraindicated with AbbVie's ombitasvir/paritaprevir/ritonavir with dasabuvir, refer to the recommended prescribing information section of the approved local product labels in countries where the regimen contained in this study (ie, ombitasvir/paritaprevir/ritonavir with dasabuvir) has received marketing authorization. If locally approved labels are not available, refer to the following Contraindicated Medication list:

|                   |                                          |                         |
|-------------------|------------------------------------------|-------------------------|
| Alfuzosin         | Ergotamine                               | Phenytoin               |
| Astemizole        | Ergonovine                               | Pimozide                |
| Atorvastatin      | Ethinyl estradiol-containing medications | Ranolazine              |
| Blonanserin       | Fusidic acid                             | Rifampin                |
| Carbamazepine     | Gemfibrozil <sup>‡</sup>                 | Salmeterol              |
| Cisapride         | Lovastatin                               | Sildenafil <sup>†</sup> |
| Colchicine*       | Lurasidone                               | Simvastatin             |
| Dihydroergotamine | Methylergonovine                         | St. John's wort         |
| Dronedarone       | Midazolam (oral)                         | Terfenadine             |
| Efavirenz         | Phenobarbital                            | Triazolam               |

\*When used in patients with renal or hepatic impairment.

<sup>†</sup>When used for the treatment of pulmonary arterial hypertension.

<sup>‡</sup>Strong CYP2C8 inhibitors (e.g., gemfibrozil) and CYP2C8 inducers are not contraindicated with ombitasvir, paritaprevir and ritonavir (for GT4 patients).

Note: Not all medications contraindicated with RBV are listed above. Refer to the most current package inserts or product labeling of RBV for a complete list of contraindicated medications.

3. Clinically significant abnormalities or comorbidities, other than HCV infection that make the subject an unsuitable candidate for this study or treatment with RBV (if applicable) in the opinion of the investigator.
4. Positive test result for hepatitis B virus surface antigen or anti-HIV antibody test.

5. Current enrollment in another interventional clinical study, previous enrollment in this study, prior or current use of any investigational or commercially available anti-HCV agents other than IFNs or RBV, or receipt of any investigational product within 6 weeks prior to study drug administration.
6. History of solid organ transplant.
7. Prior or current use of any investigational or commercially available anti-HCV agents other than IFN, pegIFN or RBV, including telaprevir, boceprevir, sofosbuvir, ombitasvir, dasabuvir, paritaprevir, ledipasvir, daclatasvir, simeprevir, elbasvir, grazoprevir, or an investigational direct-acting antiviral.
8. Screening laboratory analyses showing any of the following abnormal laboratory results:
  - Albumin <2.8 g/dL
  - Hemoglobin <10 g/dL
  - Platelets <25,000 cells/mm<sup>3</sup>
  - Total bilirubin >3.0 mg/dL
9. Any current or past clinical evidence of Child-Pugh B or C classification (Child-Pugh score  $\geq 7$ ), or clinical history of liver decompensation such as ascites (noted on physical examination), variceal bleeding, or hepatic encephalopathy.
10. Confirmed presence of hepatocellular carcinoma indicated on imaging techniques such as computed tomography (CT) scan or magnetic resonance imaging (MRI) within 3 months prior to screening or on an ultrasound performed at screening for patients with cirrhosis (a positive ultrasound result will be confirmed with CT scan or MRI).
11. Male subject who is considering fathering a child or donating sperm during the study or for approximately 120 days after stopping study drug if receiving DAAs only, or for up to 7 months after stopping study drug if receiving RBV (or as directed by local RBV label).

## Supplemental 2: Pharmacokinetic Assessments

Blood samples were collected for intensive pharmacokinetic analysis at 2, 4, 8, 12, and 24 hours post dose at the Week 2 visit. Additional sparse samples were taken on Day 1 (at 4 hours post dose), Week 4 (regardless of dosing time), Week 8 (trough sample), and Week 12 (regardless of dosing time). Plasma concentrations of study drugs and DSV M1 metabolite were determined using validated analytical methods developed by the Drug Analysis Department at AbbVie. The primary pharmacokinetic endpoints were the maximum plasma concentrations ( $C_{max}$ ) and the area under the plasma concentration–time curve (AUC) (at 0 to 24 hours for OBV, PTV, and ritonavir, or 0 to 12 hours for DSV and DSV M1) following dosing at Week 2 and trough concentrations ( $C_{trough}$ ) following dosing at Weeks 2 and 8.

## Figure, Supplement 3

Percentage of patients with ALT Grades normal, 1, 2, 3, or 4 by treatment visit (safety population; observed cases). Clinical severity CTCAE Grade 1,  $\geq 3 \times$  ULN; Grade 2,  $>3\text{--}5 \times$  ULN; Grade 3,  $>5\text{--}30 \times$  ULN; Grade 4,  $>20 \times$  ULN. \*Excluded 1 patient who discontinued from study treatment 9 days after treatment initiation.

ALT = alanine aminotransferase; CTCAE = National Cancer Institute Common Terminology Criteria for Adverse Events; ULN = upper limit of normal.

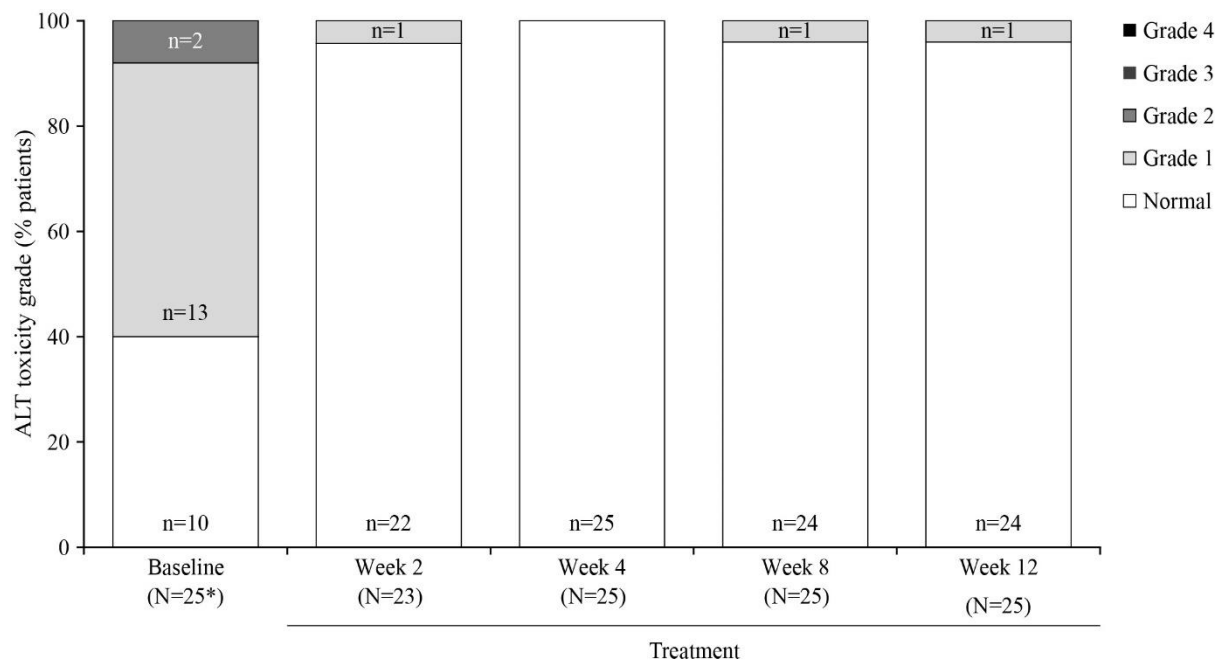

#### Supplement 4. Summary statistics of pharmacokinetic parameters by weight group

|                     |    | $C_{max}$<br>(ng/mL) | $T_{max}^a$<br>(h) | AUC <sup>b</sup><br>(ng•h/mL) | Week 2 $C_{trough}$<br>(ng/mL) | Week 8 $C_{trough}$<br>(ng/mL) |
|---------------------|----|----------------------|--------------------|-------------------------------|--------------------------------|--------------------------------|
| <b>Ombitasvir</b>   |    |                      |                    |                               |                                |                                |
| 15–29               | 12 | 99.6 (27)            | 4.0                | 1270 (26)                     | 24.7 (32)                      | 29.6 (78) <sup>c</sup>         |
|                     |    | 63.9–154             | 4.0–4.5            | 776–1850                      | 11.7–37.5                      | 8.06–90.7                      |
| 30–44               | 9  | 116 (14)             | 4.0                | 1490 (12) <sup>d</sup>        | 28.2 (16) <sup>d</sup>         | 30.4 (24) <sup>e</sup>         |
|                     |    | 97.3–148             | 4.0–4.0            | 1260–1790                     | 22.9–34.3                      | 21.4–40.9                      |
| ≥45                 | 13 | 83.7 (39)            | 4.0                | 1060 (43) <sup>f</sup>        | 21.8 (39) <sup>f</sup>         | 20.9 (58) <sup>c</sup>         |
|                     |    | 46.1–150             | 2.0–8.0            | 664–2210                      | 14.5–42.3                      | 0–44.5                         |
| <b>Paritaprevir</b> |    |                      |                    |                               |                                |                                |
| 15–29               | 12 | 294 (152)            | 4.0                | 2180 (136)                    | 9.86 (113)                     | 17.3 (136)                     |
|                     |    | 47.4–3610            | 2.0–4.5            | 447–19100                     | 2.89–63.9                      | 1.00–83.9                      |
| 30–44               | 9  | 1540 (71)            | 4.0                | 8640 (90) <sup>d</sup>        | 16.1 (112) <sup>d</sup>        | 18.4 (89) <sup>e</sup>         |
|                     |    | 272–4190             | 2.0–4.0            | 1640–34900                    | 3.15–96.9                      | 4.16–50.8                      |
| ≥45                 | 13 | 870 (125)            | 4.0                | 5770 (152) <sup>f</sup>       | 18.0 (78) <sup>f</sup>         | 23.5 (86) <sup>c</sup>         |
|                     |    | 266–6590             | 4.0–8.0            | 2020–55500                    | 5.86–63.9                      | 0–69.2                         |
| <b>Ritonavir</b>    |    |                      |                    |                               |                                |                                |
| 15–29               | 12 | 1090 (67)            | 2.0                | 6570 (60)                     | 16.1 (72)                      | 91.8 (268)                     |
|                     |    | 199–3050             | 2.0–4.0            | 1520–16200                    | 8.57–54.6                      | 0–855                          |
| 30–44               | 9  | 1830 (42)            | 2.4                | 14100 (49)                    | 32.1 (63)                      | 38.1 (112) <sup>e</sup>        |
|                     |    | 851–3230             | 2.0–4.0            | 6760–29700                    | 8.14–89.3                      | 12.1–133                       |
| ≥45                 | 13 | 1180 (35)            | 4.0                | 8900 (37) <sup>f</sup>        | 29.8 (54) <sup>f</sup>         | 58.2 (138) <sup>c</sup>        |
|                     |    | 397–1940             | 2.0–8.0            | 3640–17800                    | 12.2–81.2                      | 0–278                          |

| Dasabuvir               |    |           |         |                         |           |                         |
|-------------------------|----|-----------|---------|-------------------------|-----------|-------------------------|
| 15–29                   | 12 | 579 (44)  | 4.0     | 3960 (44) <sup>g</sup>  | 110 (57)  | 168 (82)                |
|                         |    | 292–1180  | 2.0–8.0 | 1820–8630               | 54.9–281  | 12.3–426                |
| 30–44                   | 9  | 830 (45)  | 4.0     | 5960 (47) <sup>g</sup>  | 215 (54)  | 264 (65) <sup>e</sup>   |
|                         |    | 549–1840  | 2.0–4.0 | 4230–13700              | 117–518   | 120–621                 |
| ≥45                     | 13 | 671 (48)  | 4.0     | 4630 (49)               | 165 (56)  | 191 (60) <sup>c</sup>   |
|                         |    | 241–1470  | 2.0–8.0 | 1820–10200              | 42.0–469  | 11.4–361                |
| Dasabuvir M1 metabolite |    |           |         |                         |           |                         |
| 15–29                   | 12 | 173 (75)  | 4.0     | 1140 (72) <sup>g</sup>  | 25.4 (77) | 45.5 (135)              |
|                         |    | 89.7–563  | 2.0–8.0 | 689–3900                | 11.0–97.6 | 0–231                   |
| 30–44                   | 9  | 336 (34)  | 4.0     | 2320 (38) <sup>g</sup>  | 64.8 (53) | 65.2 (44) <sup>e</sup>  |
|                         |    | 181–525   | 4.0–4.0 | 1130–3740               | 23.5–131  | 41.8–116                |
| ≥45                     | 13 | 312 (43)  | 4.0     | 2010 (44)               | 55.9 (58) | 54.7 (57) <sup>c</sup>  |
|                         |    | 72.8–680  | 2.0–8.0 | 649–4020                | 26.4–48   | 0–89.6                  |
| Ribavirin               |    |           |         |                         |           |                         |
| 15–29                   | 12 | 2100 (28) | 2.0     | 19000 (24) <sup>g</sup> | 1300 (25) | 1720 (40) <sup>cd</sup> |
|                         |    | 1060–2790 | 2.0–4.0 | 11200–25300             | 759–1930  | 469–2560                |
| 30–44                   | 9  | 2440 (16) | 2.0     | 24200 (15) <sup>g</sup> | 1710 (15) | 2170 (16) <sup>e</sup>  |
|                         |    | 1940–3030 | 2.0–4.0 | 19500–29600             | 1320–2130 | 1720–2910               |
| ≥45                     | 9  | 2320 (26) | 2.0     | 22800 (24)              | 1590 (23) | 2080 (45) <sup>e</sup>  |
|                         |    | 1300–2970 | 2.0–4.0 | 13800–29900             | 998–2120  | 778–3090                |

Data are geometric mean (%CV) and range unless stated otherwise.

AUC<sub>0–12</sub> = area under the plasma concentration–time curve from time 0 to 12 hours; AUC<sub>0–24</sub> = area under the plasma concentration–time curve from time 0 to 24 hours; CV = coefficient of variation; T<sub>max</sub> = time to maximum observed plasma concentration.

<sup>a</sup> Median and range.

<sup>b</sup> AUC<sub>0–24</sub> for ombitasvir, paritaprevir, and ritonavir; AUC<sub>0–12</sub> for dasabuvir, dasabuvir M1, and ribavirin.

<sup>c</sup> N = 11.

<sup>d</sup> N = 8.

<sup>e</sup> N = 7.

<sup>f</sup> N = 12.

<sup>g</sup>For 2 patients, the 24-hour concentration was used as the 12-hour concentration because of significant sampling time deviation

### Figure, Supplement 5

Comparison of individual C<sub>max</sub> and AUC values between historical data in adults and pediatric weight groups. **A–C.** AUC<sub>0–24</sub> for OBV, PTV, ritonavir, and DSV. **D.** AUC<sub>0–12</sub> for DSV. **E.** AUC<sub>0–12</sub> for DSV M1 metabolite. The pediatric patients in the ≥45-kg group were adolescents using adult tablet formulation and children aged 9–11 years using pediatric mini-tablet formulations. Patients in the 30–44-kg and 15–29-kg groups were aged 3–11 years using pediatric mini-tablet formulations.

$AUC_{0-12}$  = area under the plasma concentration–time curve from time 0 to 12 hours;  $AUC_{0-24}$  = area under the plasma concentration–time curve from time 0 to 24 hours;  $C_{max}$  = maximum plasma concentrations; DSV = dasabuvir; OBV = ombitasvir; PTV = paritaprevir.

A

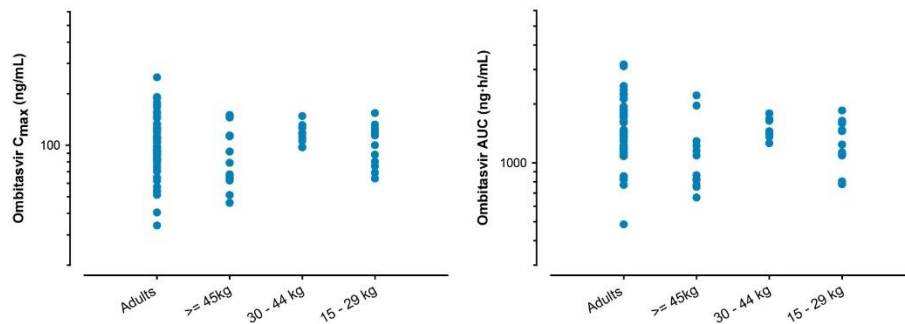

B

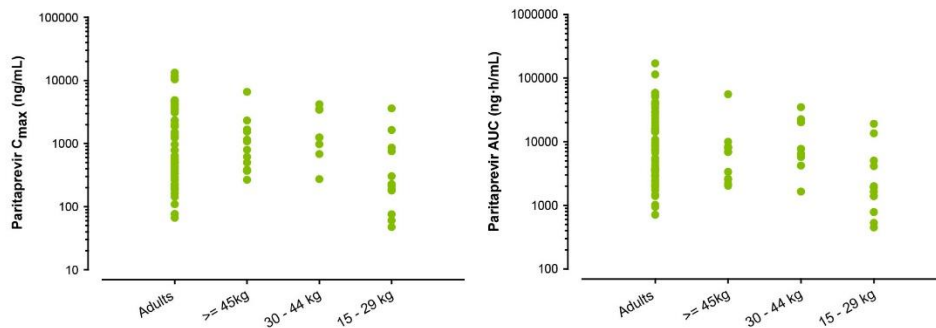

C

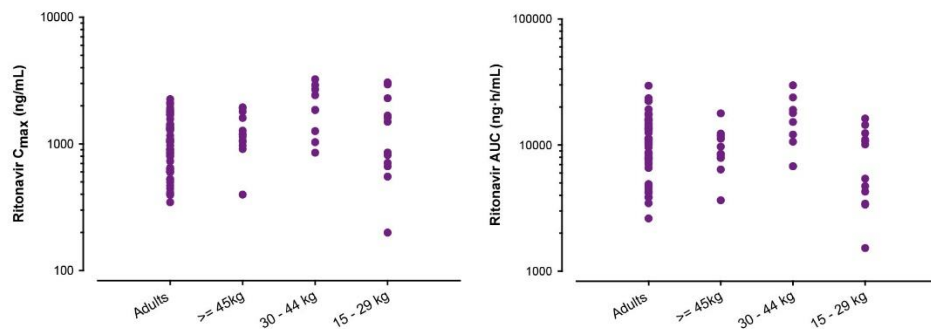

D

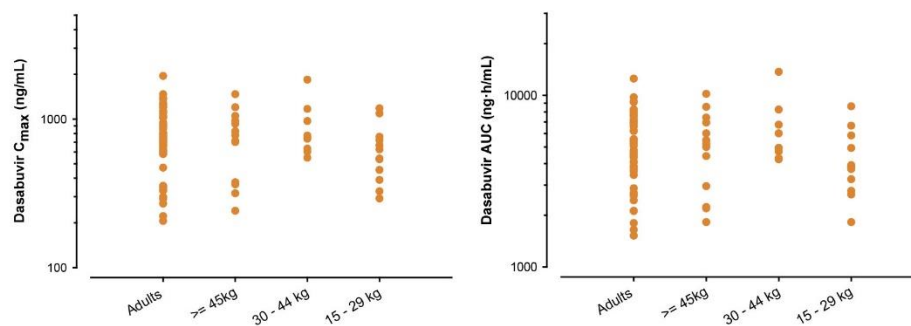

E

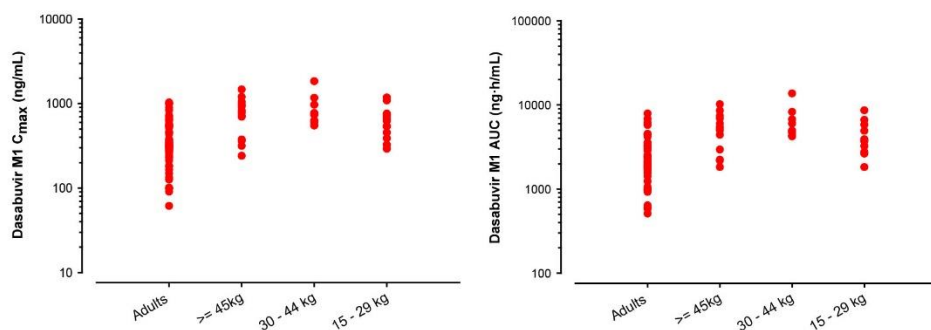

Supplement: MOESM1 [file 18011042]
